# Supplementary material for: GABAA Receptor Modulators with a Pyrazolo[1,5-a]quinazoline Core: Synthesis, Molecular Modelling Studies and Electrophysiological Assays
Source: MDPI journal article supplement (doi:10.3390/ijms232113032), 2022-10-27

## **Supporting Information**

**for**

### **GABA<sub>A</sub> Receptor Modulators with a Pyrazolo[1,5-a]quinazoline Core: Synthesis, Molecular Modelling Studies and Electrophysiological Assays**

Letizia Crocetti <sup>1</sup>, Gabriella Guerrini <sup>1\*</sup>, Fabrizio Melani <sup>1</sup>, Claudia Vergelli<sup>1</sup>, Maria Paola Mascia<sup>2</sup>  
and Maria Paola Giovannoni<sup>1</sup>

<sup>1</sup>Neurofarba, Pharmaceutical and Nutraceutical Section, University of Florence, Via Ugo Schiff 6,  
50019, Sesto Fiorentino, Italy.

<sup>2</sup>CNR-Institute of Neuroscience, Cagliari, Cittadella Universitaria, 09042, Monserrato, Italy.

\*Correspondence: [gabriella.guerrini@unifi.it](mailto:gabriella.guerrini@unifi.it); Tel.: +39-055-4573766

#### **Table of contents:**

- NMR spectra of some representative compounds (1-3, 5, 6a, 6c, 8, 12a-c, 14, 16-21)

<sup>1</sup>H NMR Compound 1  
DMSO

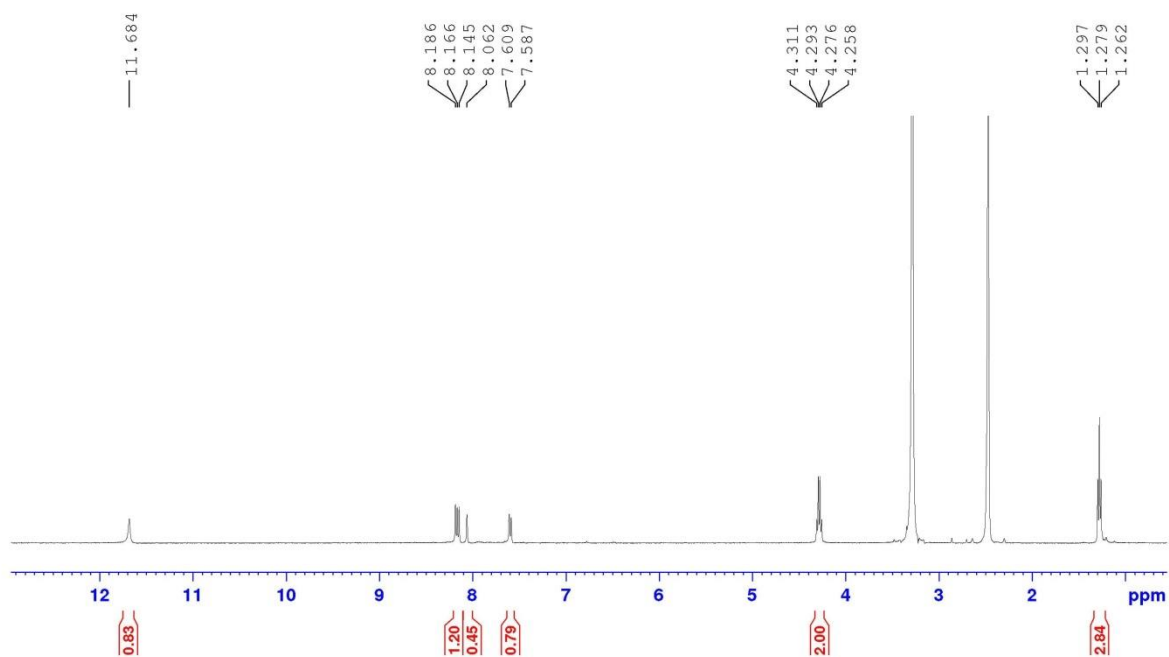

<sup>1</sup>H NMR Compound 2  
DMSO

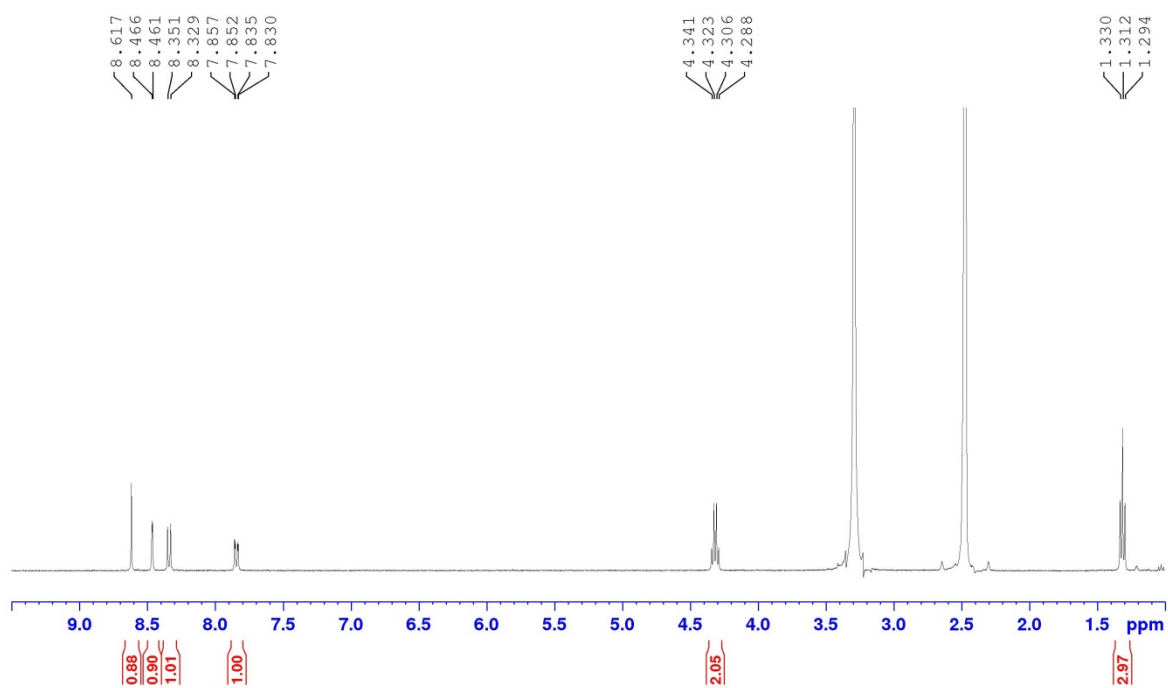

<sup>1</sup>H NMR Compound 3  
CDCl<sub>3</sub>

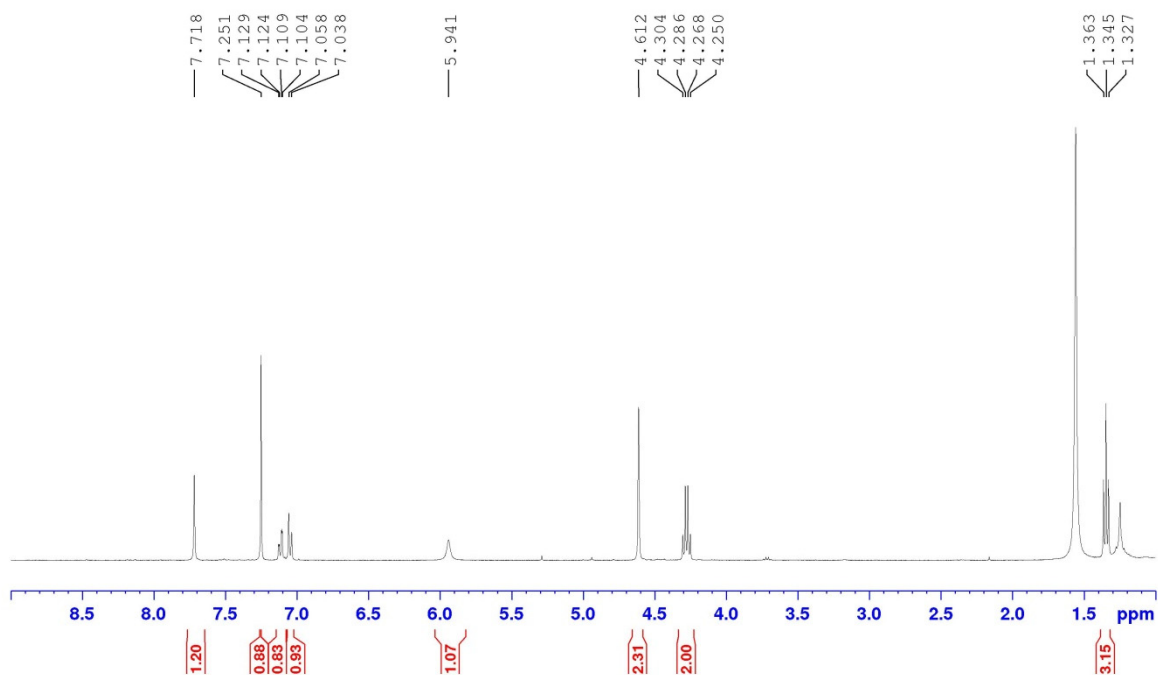

<sup>13</sup>C NMR Compound 3  
DMSO

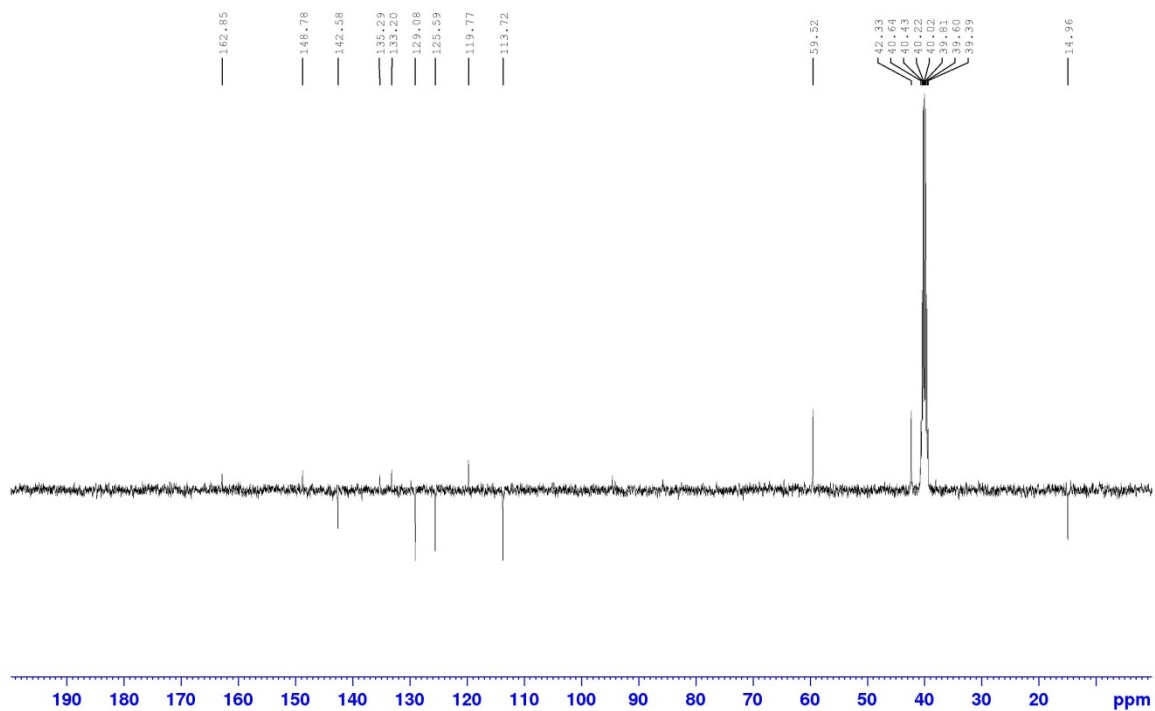

<sup>1</sup>H NMR Compound 5  
DMSO

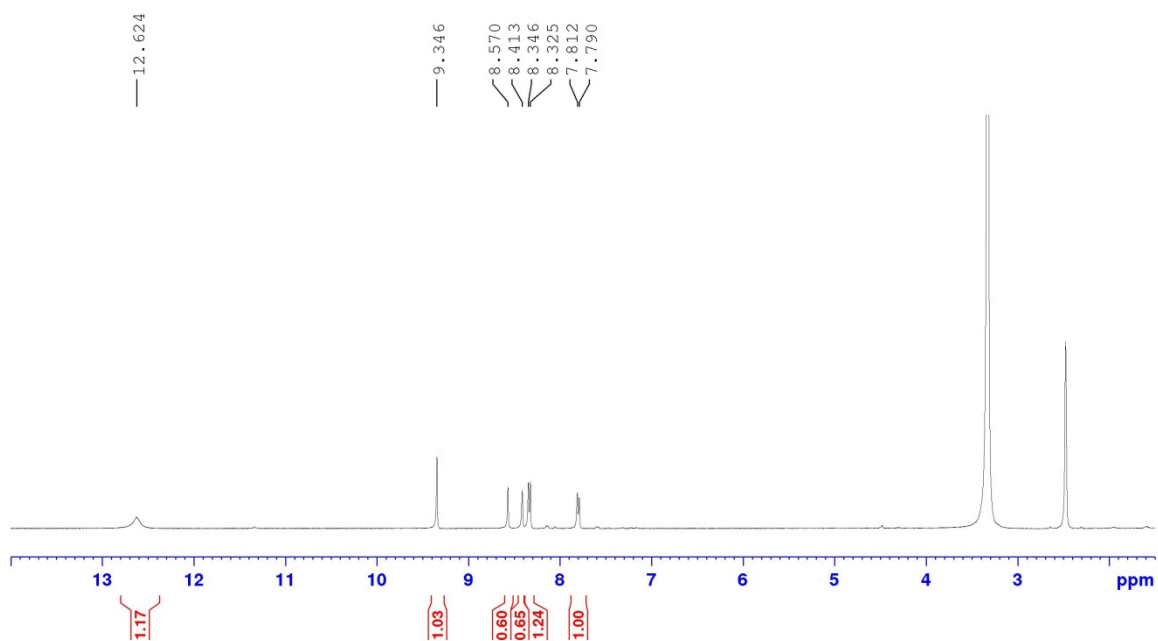

<sup>1</sup>H NMR Compound 6a  
DMSO

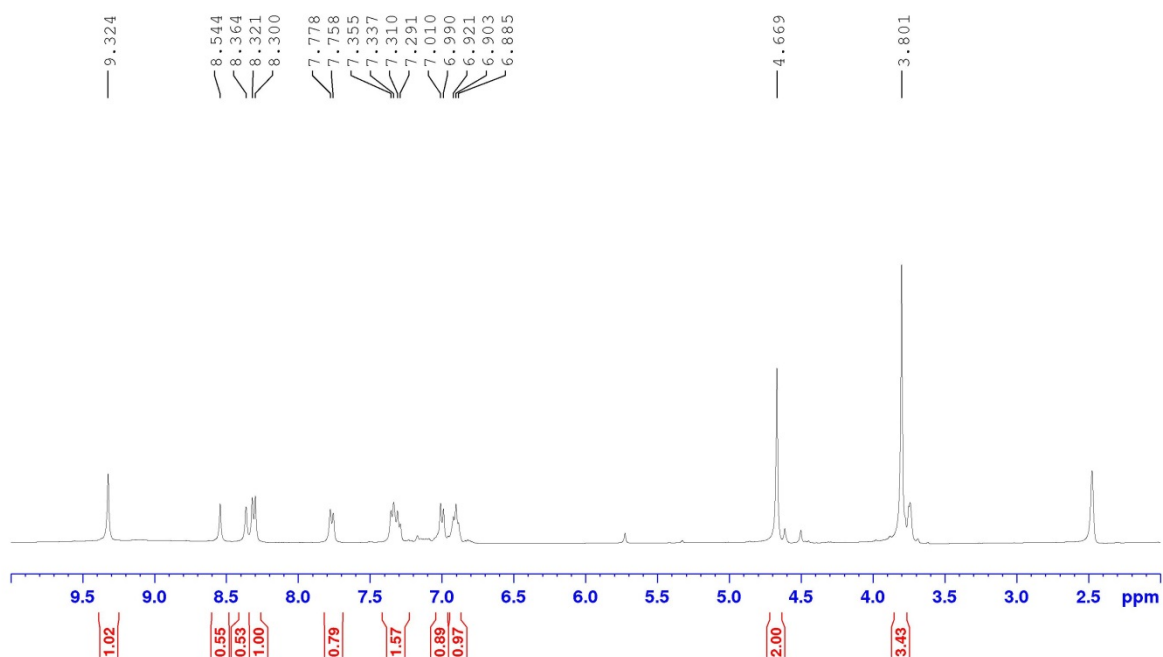

<sup>13</sup>C NMR Compound 6a  
DMSO

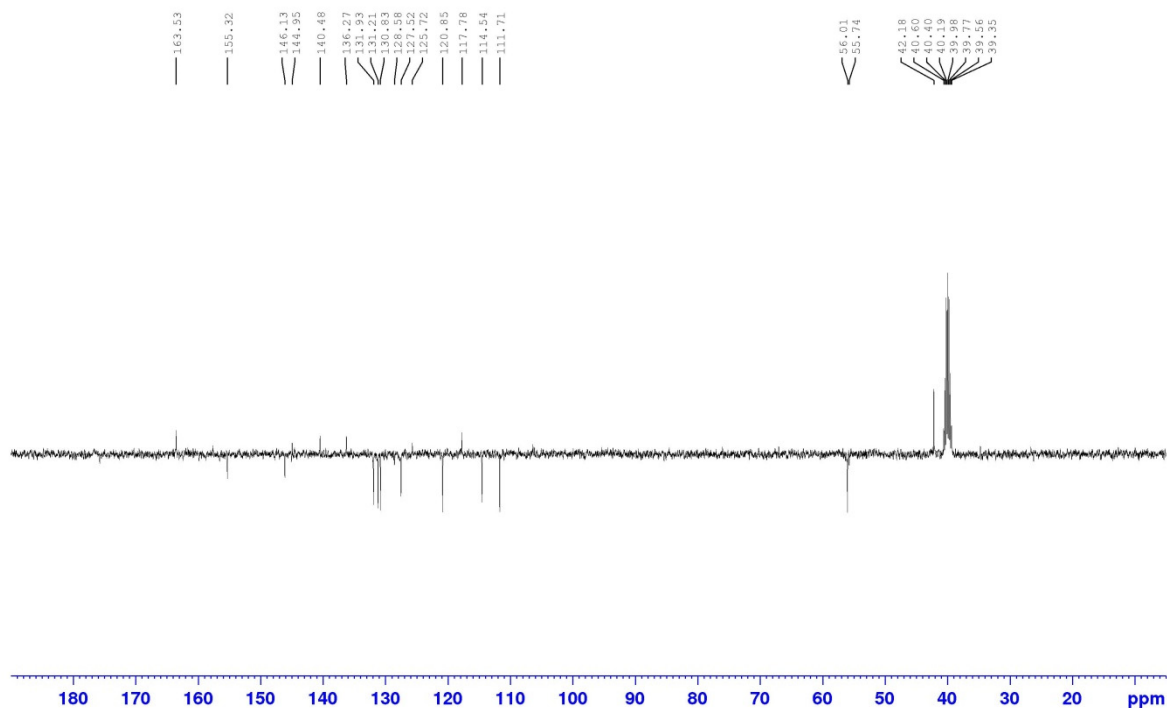

<sup>1</sup>H NMR Compound 6c  
DMSO

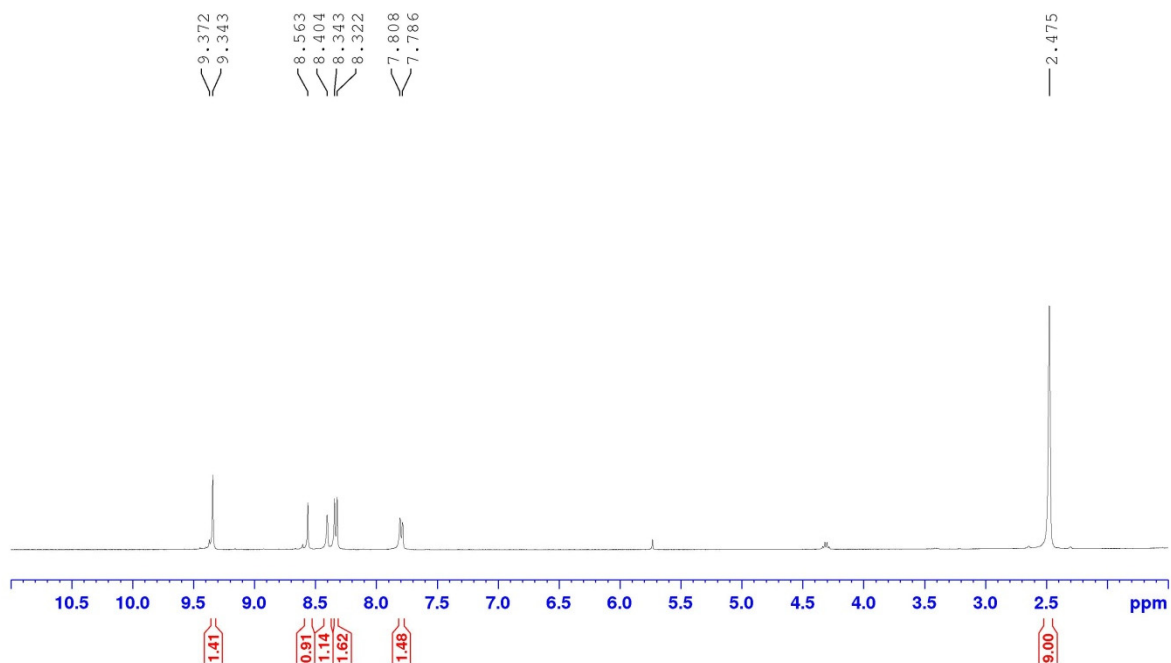

<sup>13</sup>C NMR Compound 6c  
DMSO

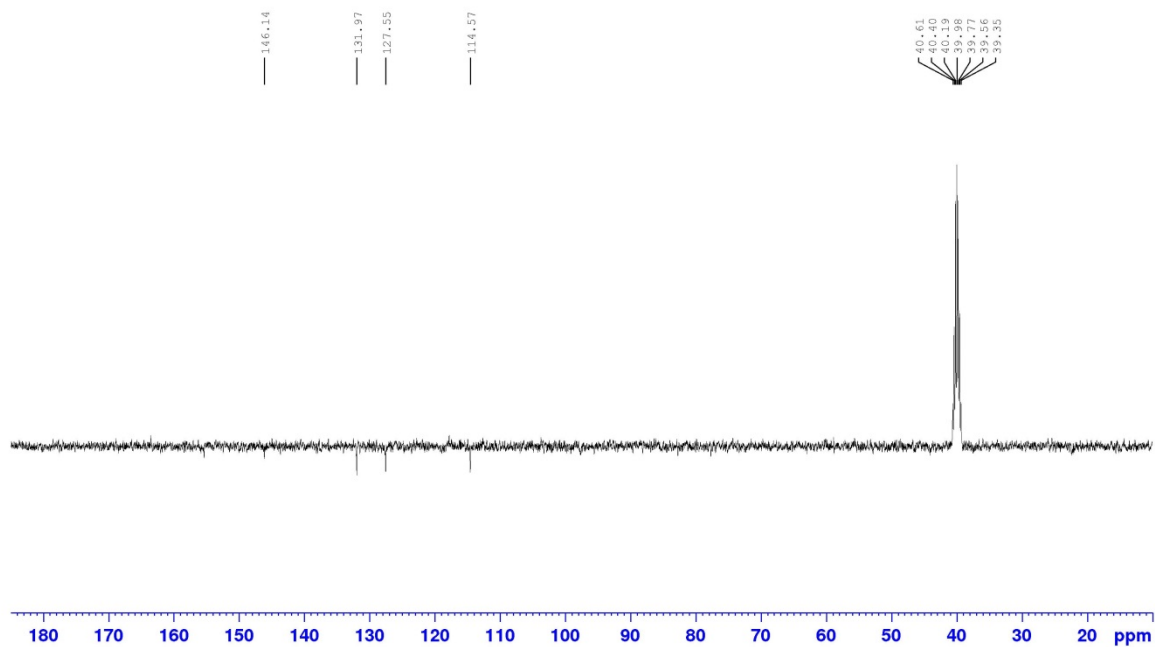

<sup>1</sup>H NMR Compound 8  
DMSO

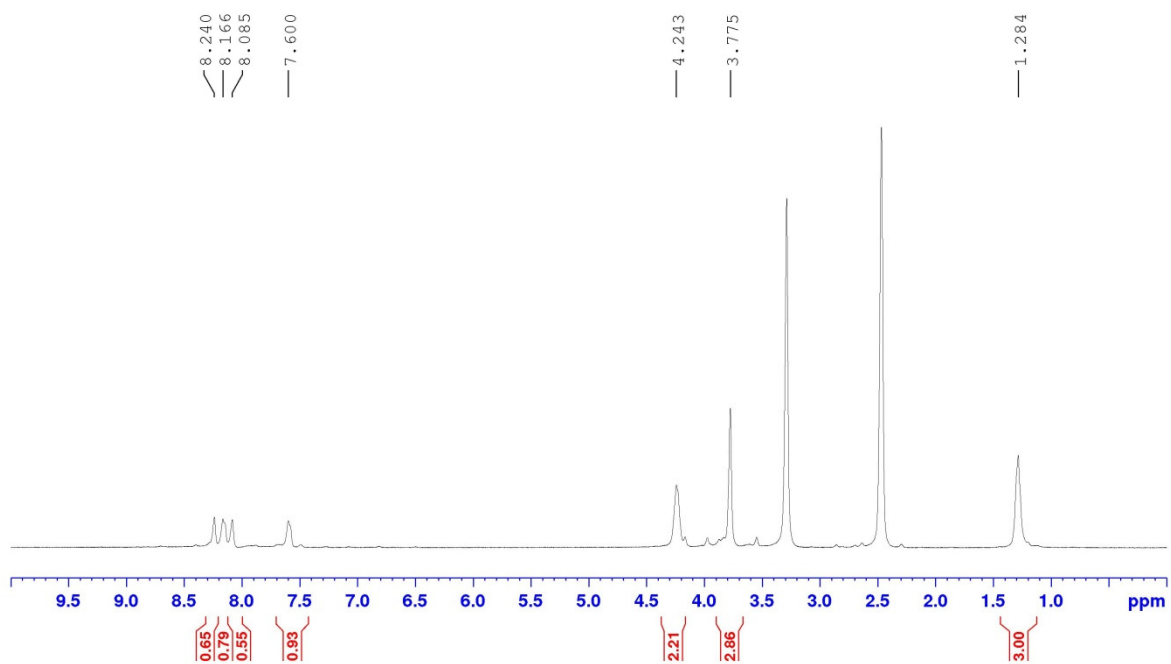

<sup>13</sup>C NMR Compound 8  
DMSO

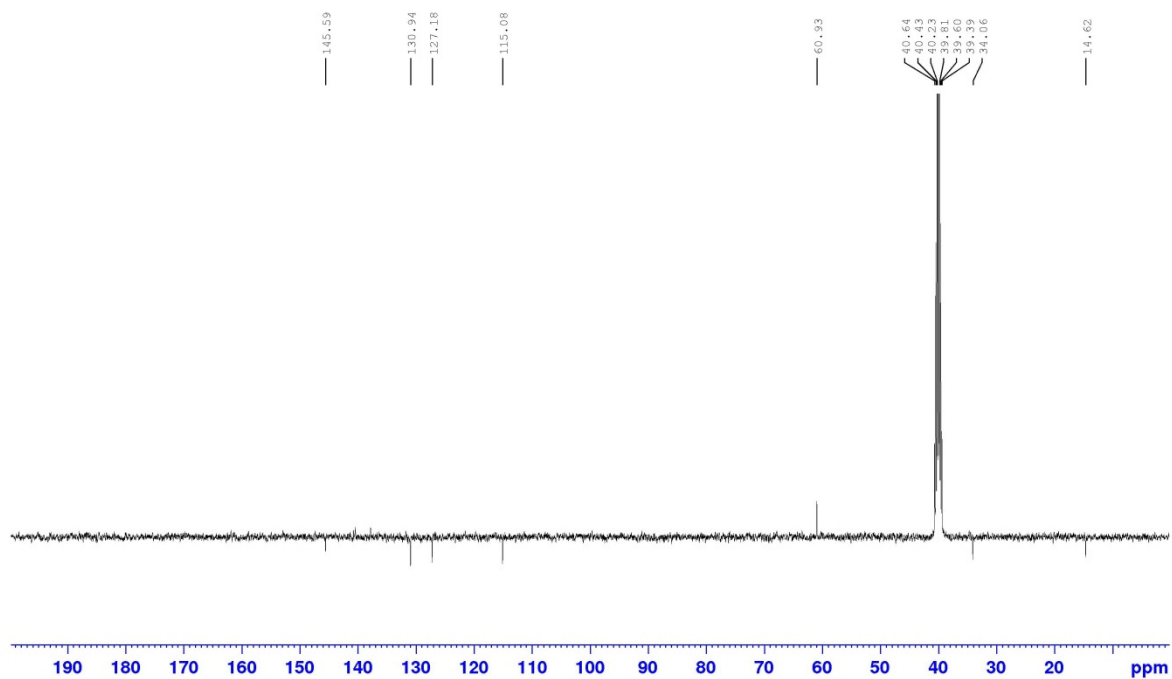

<sup>1</sup>H NMR Compound 12a  
DMSO

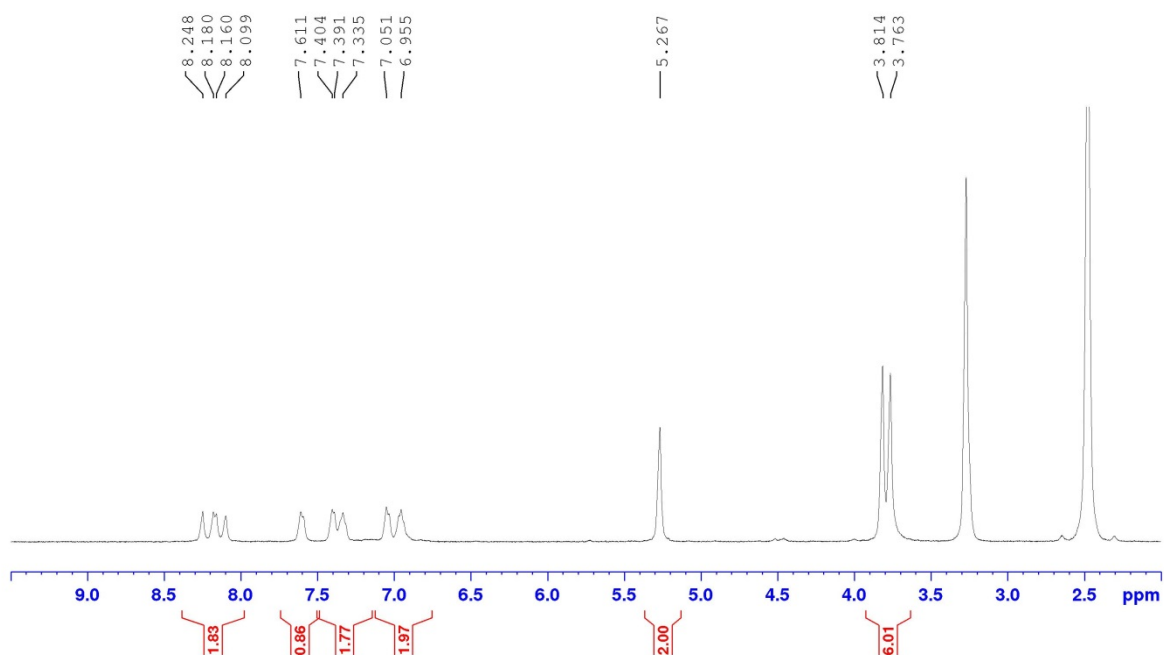

<sup>13</sup>C NMR Compound 12a  
DMSO

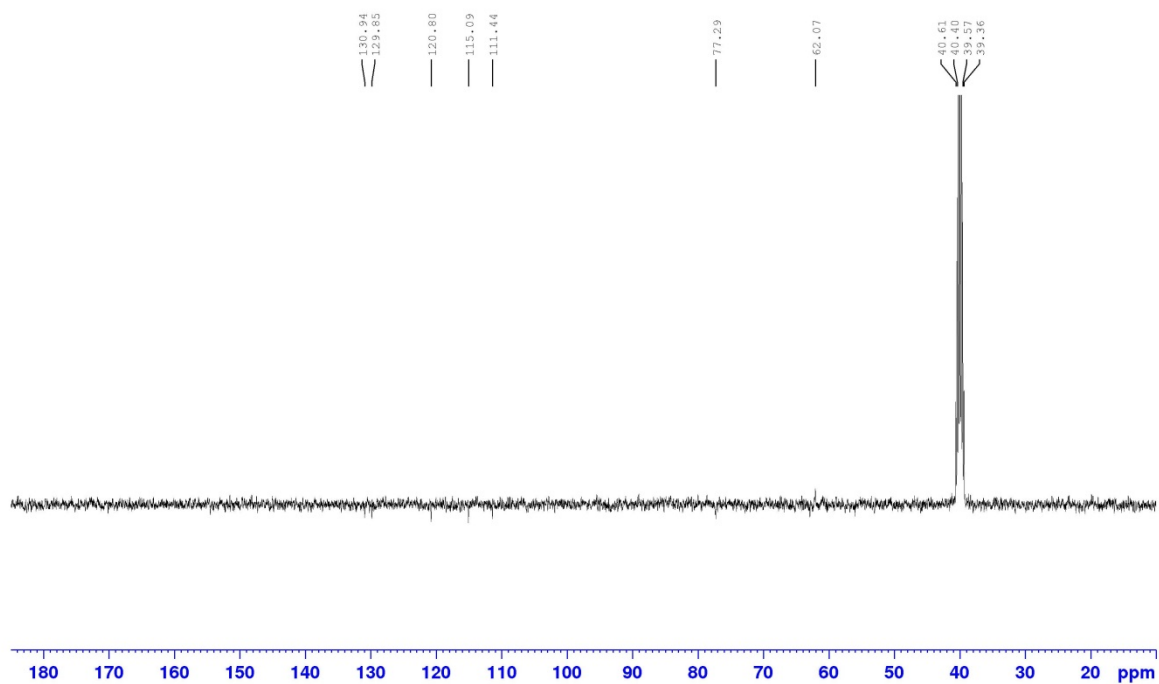

<sup>1</sup>H NMR Compound 12b  
DMSO

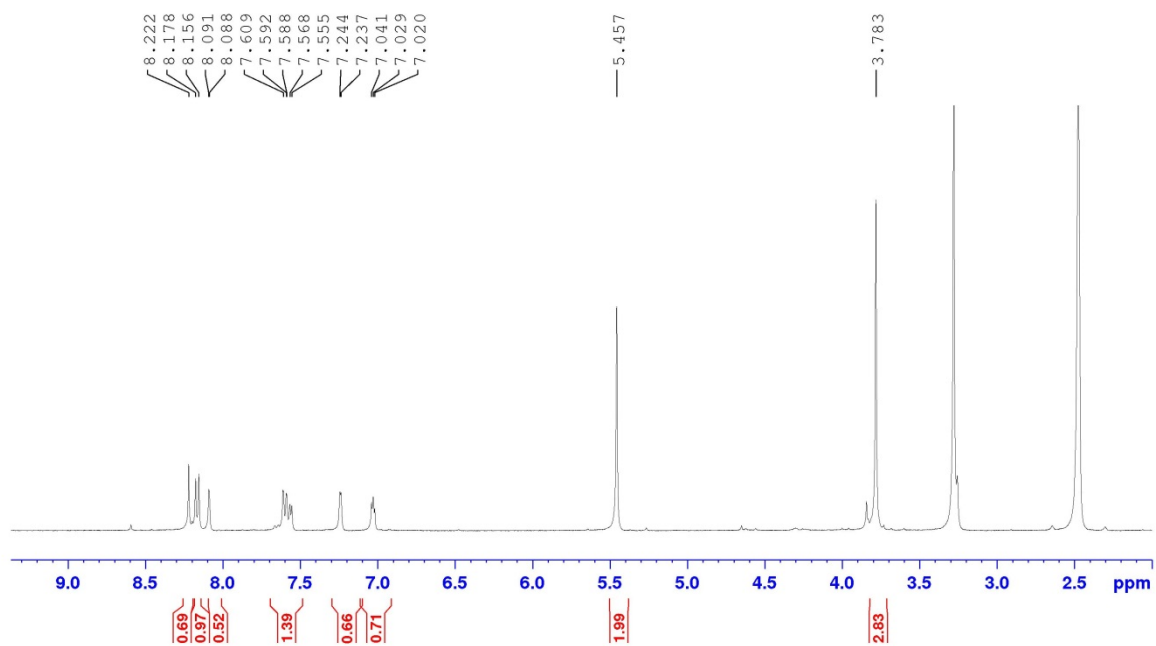



<sup>13</sup>C NMR Compound 12b  
DMSO

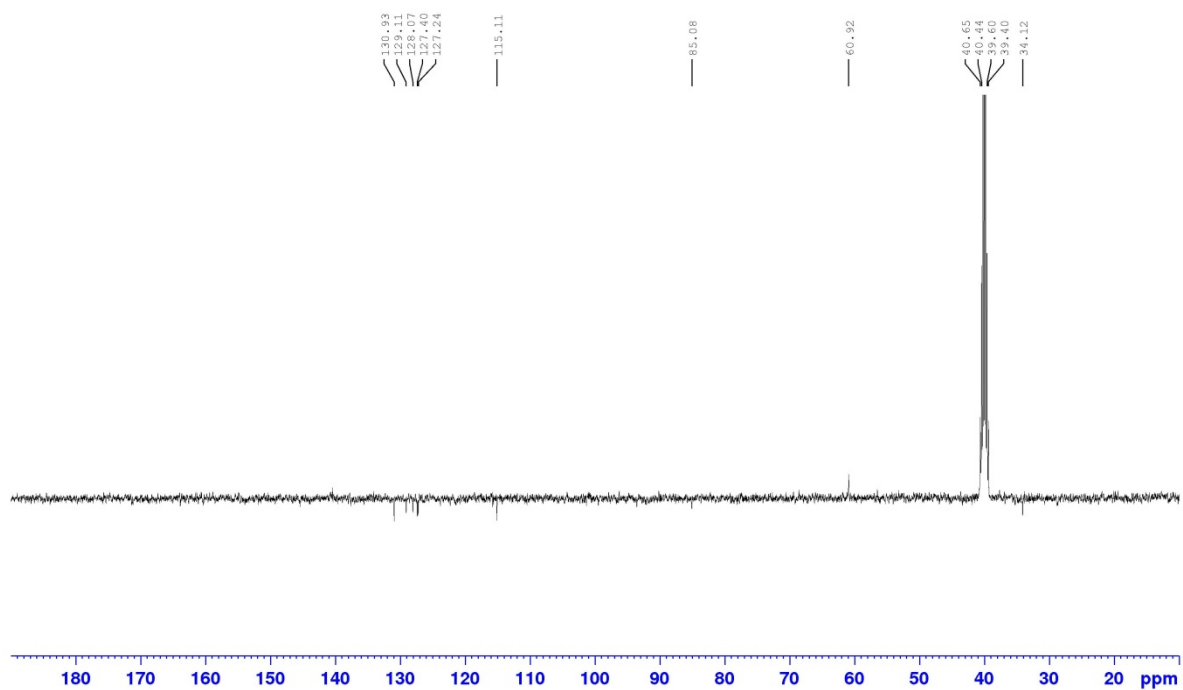

<sup>1</sup>H NMR Compound 12c  
DMSO

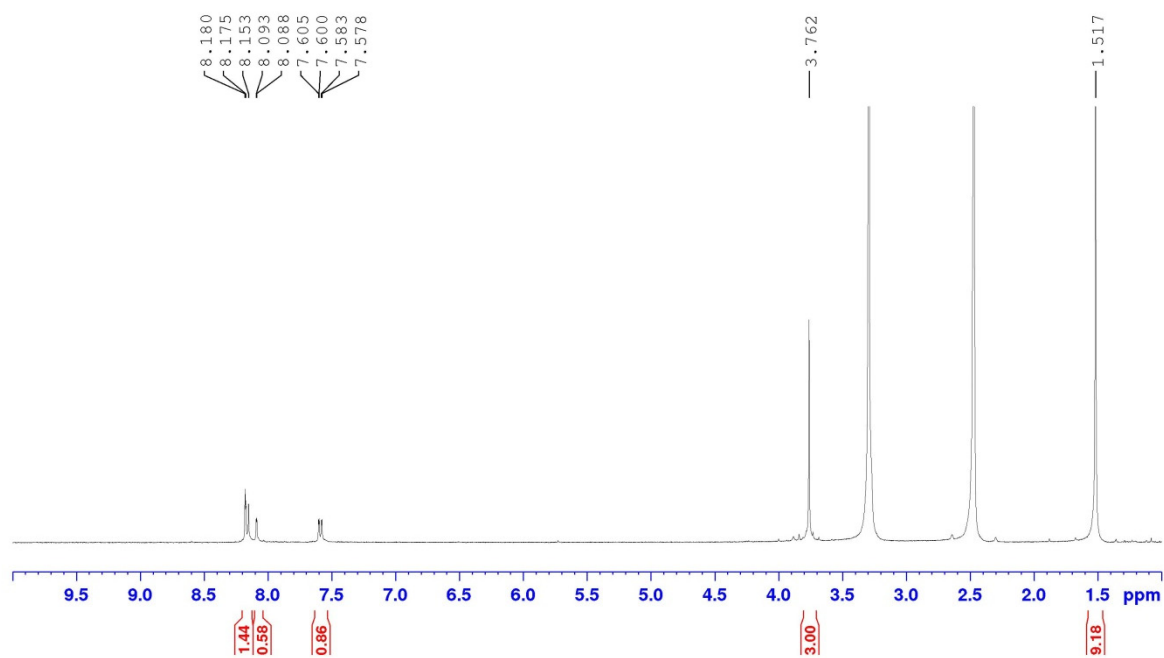

<sup>1</sup>H NMR Compound 14  
DMSO

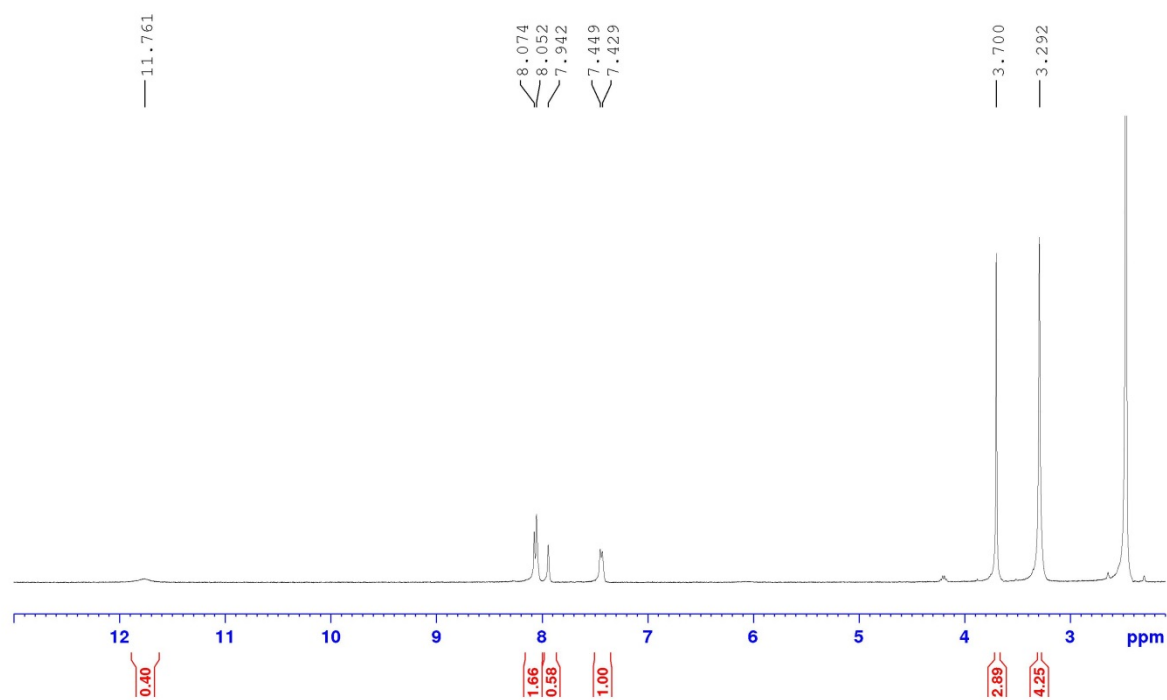

<sup>1</sup>H NMR Compound 16  
DMSO

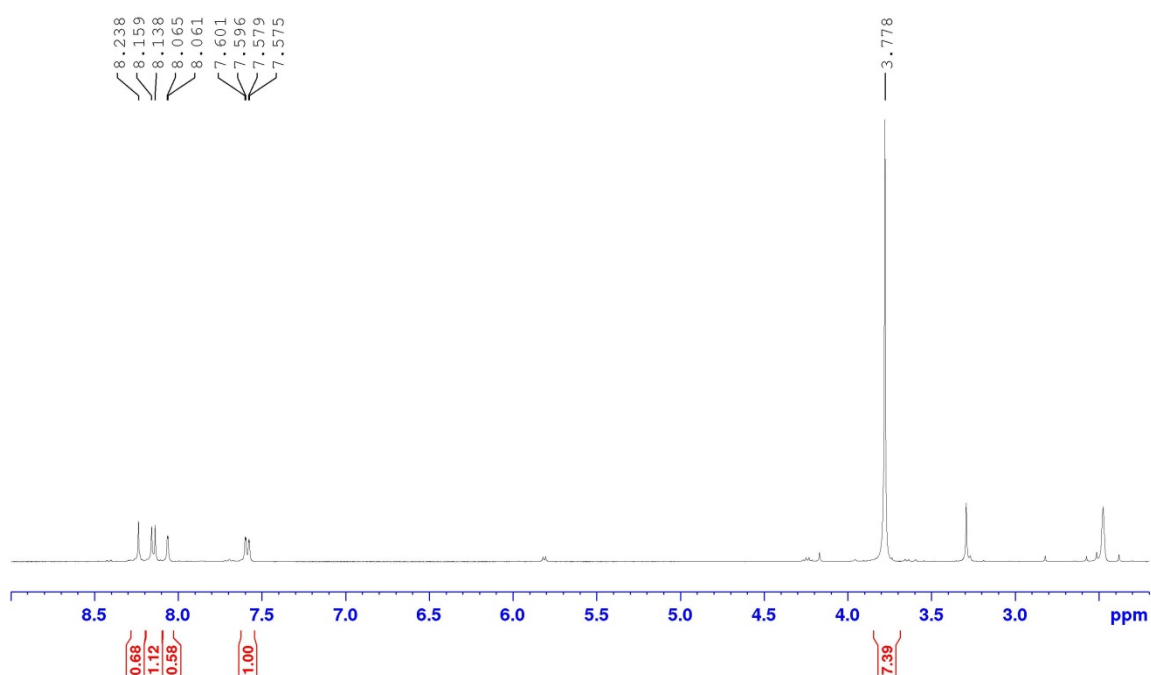

<sup>1</sup>H NMR Compound 17  
DMSO

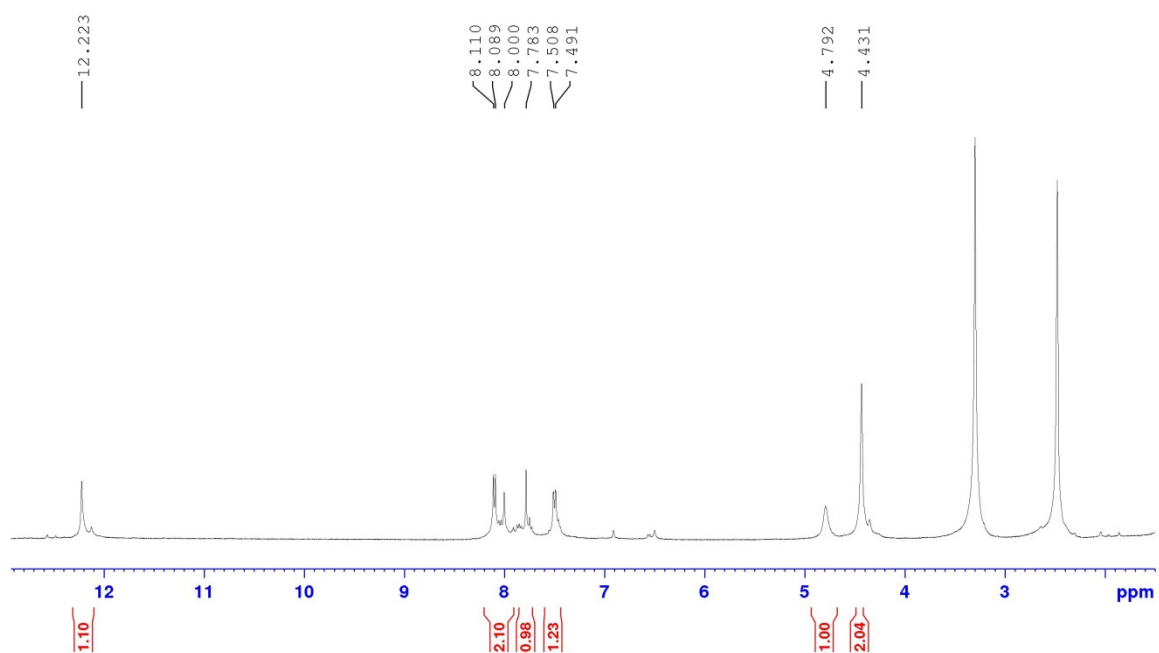

<sup>1</sup>H NMR Compound 18  
DMSO

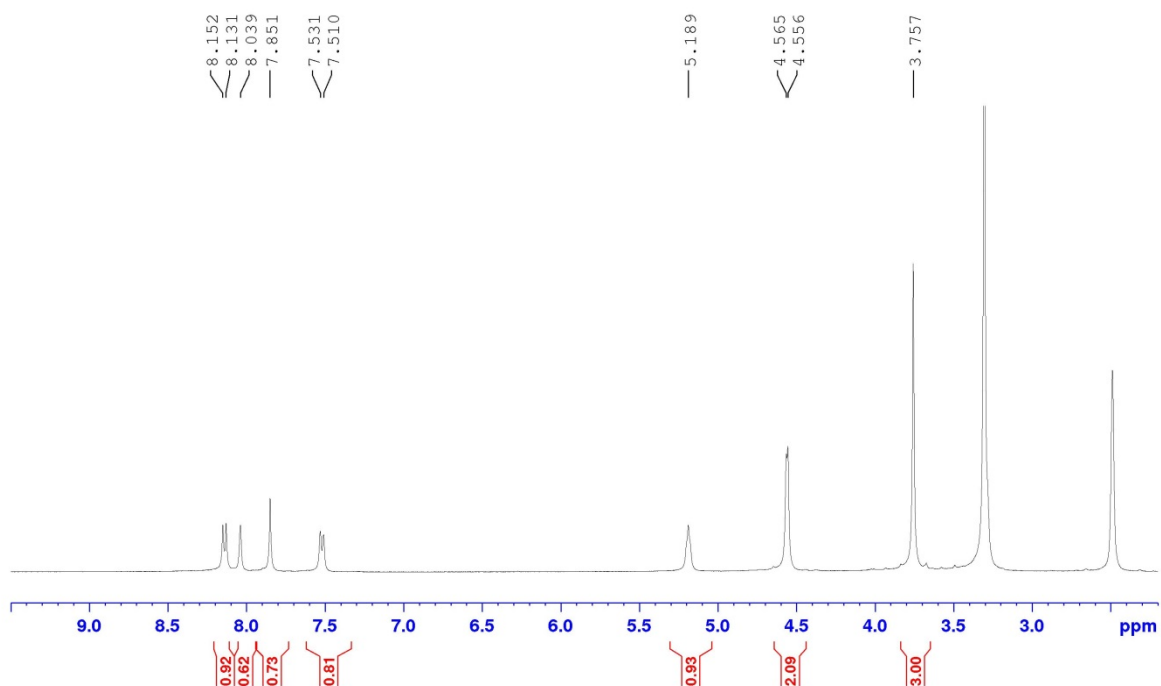

<sup>13</sup>C NMR Compound 18  
DMSO

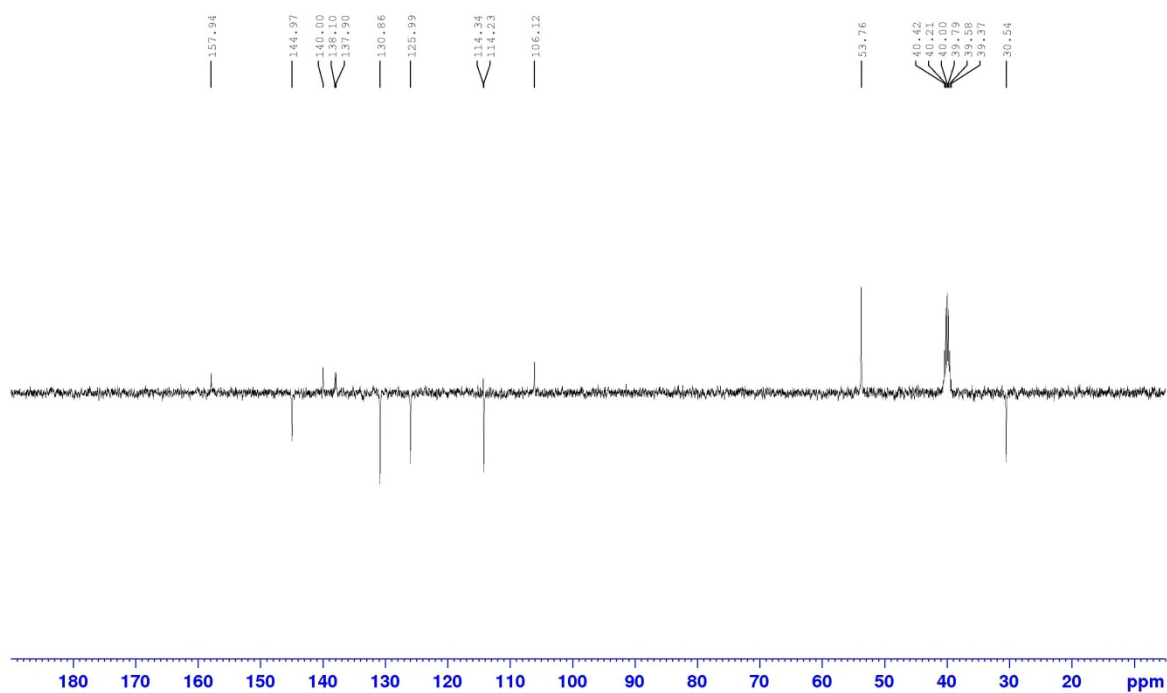

<sup>1</sup>H NMR Compound 19  
DMSO

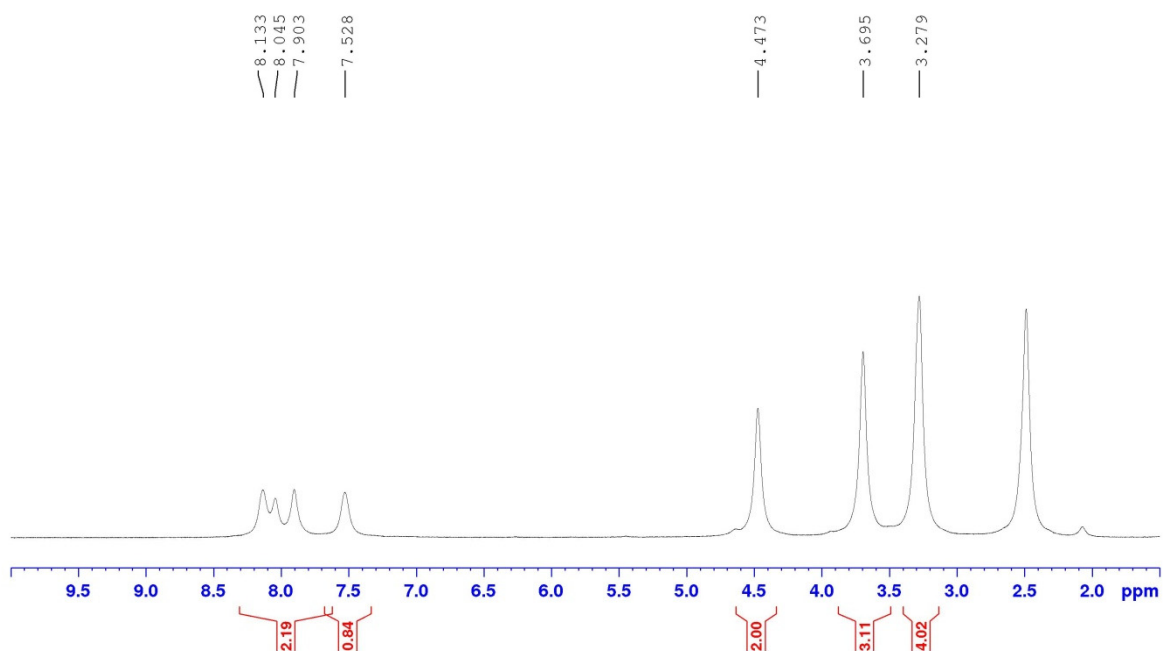

<sup>13</sup>C NMR Compound 19  
DMSO

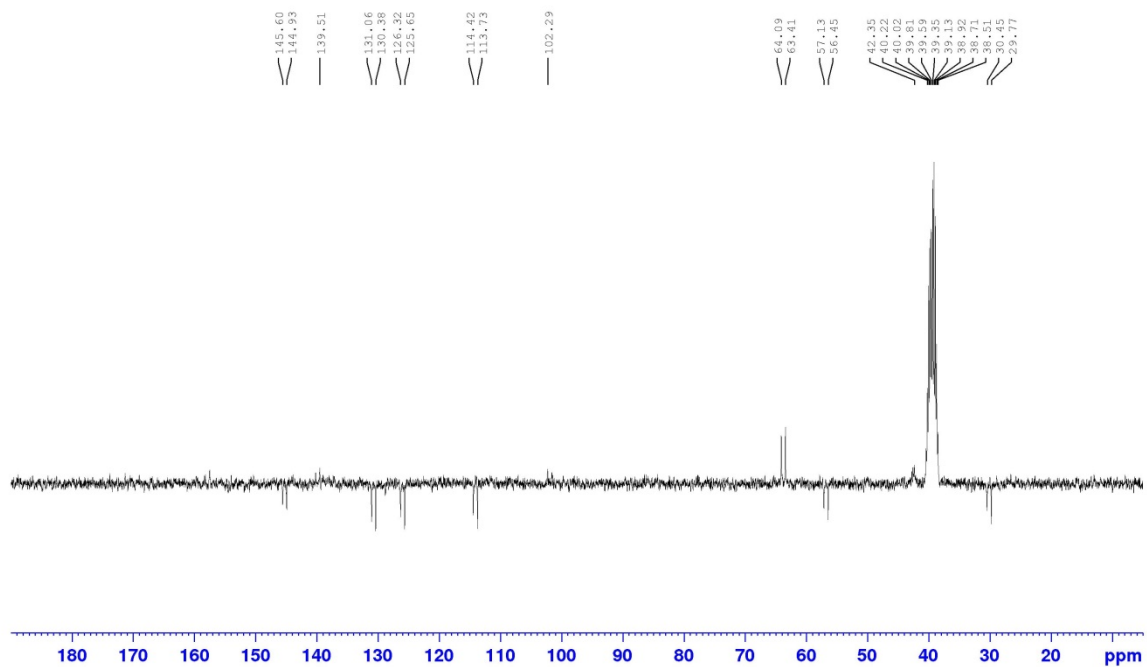

<sup>1</sup>H NMR Compound 20  
DMSO

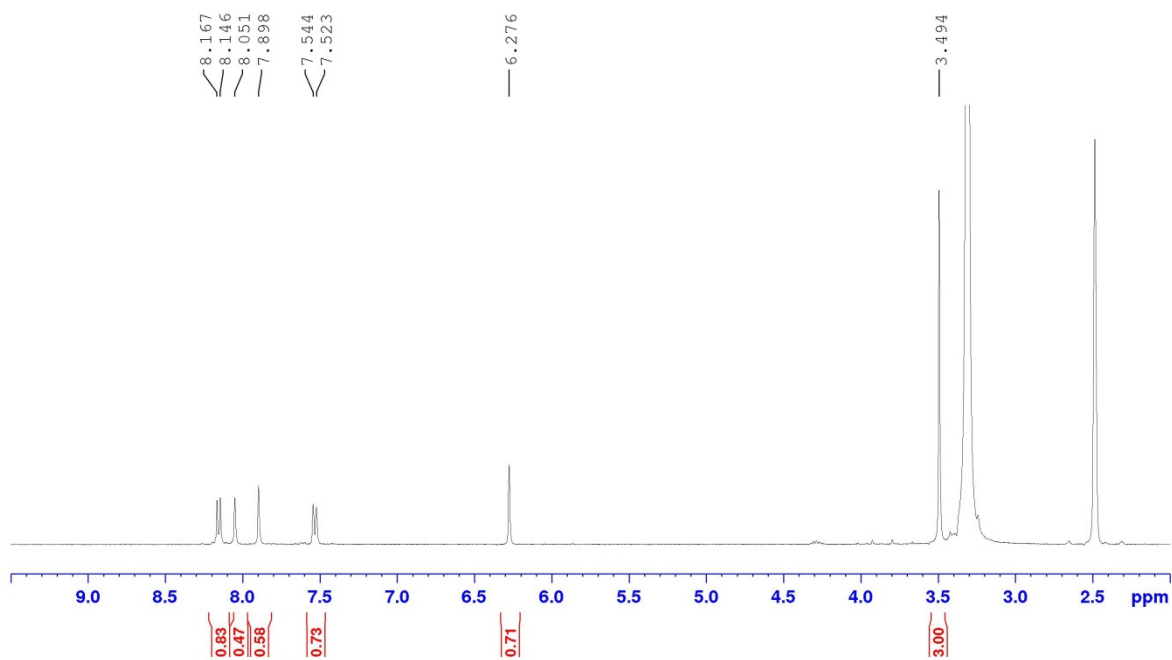

<sup>1</sup>H NMR Compound 21  
DMSO

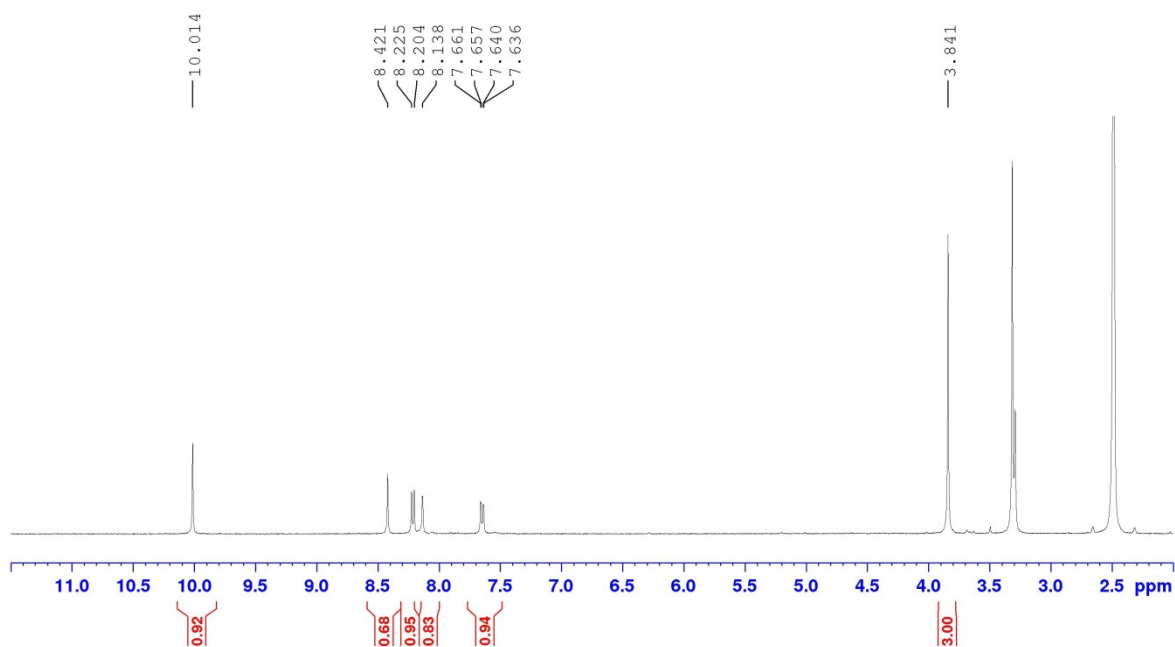

<sup>13</sup>C NMR Compound 21  
DMSO

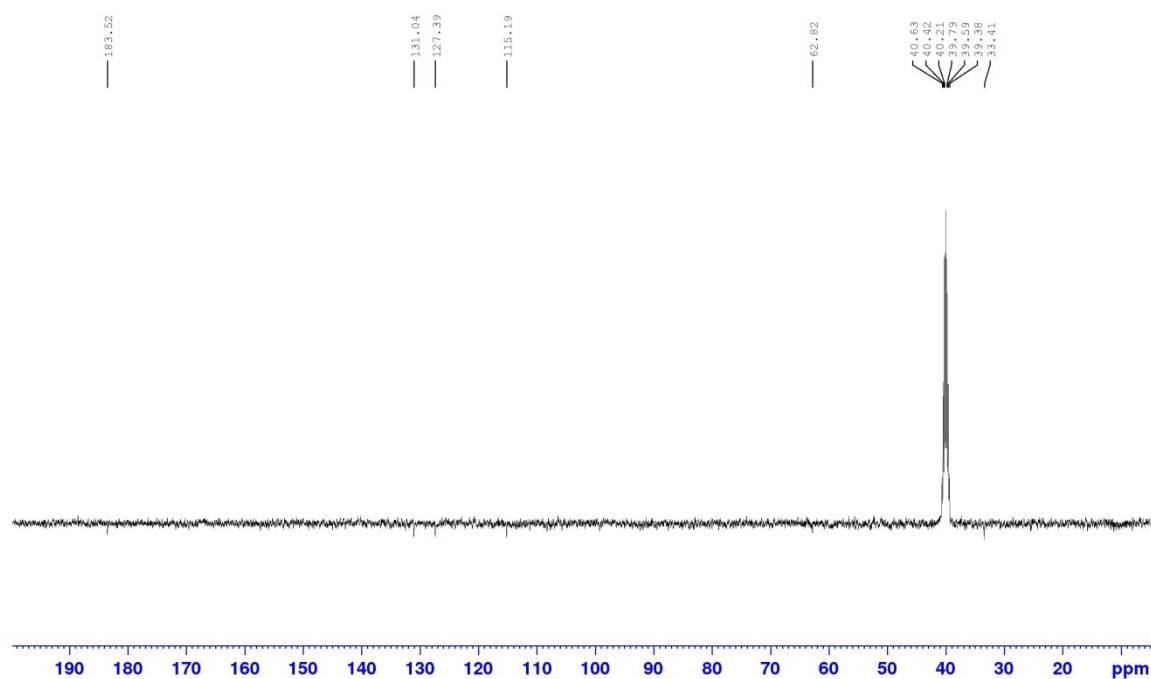

Supplement: s1 [file s1]
